# Supplementary material
Source: PubMed Central journal article supplement (PMC3154464)
Supplement: Supp_Data.pdf [file Supp_Data.pdf]

## Supplementary Data

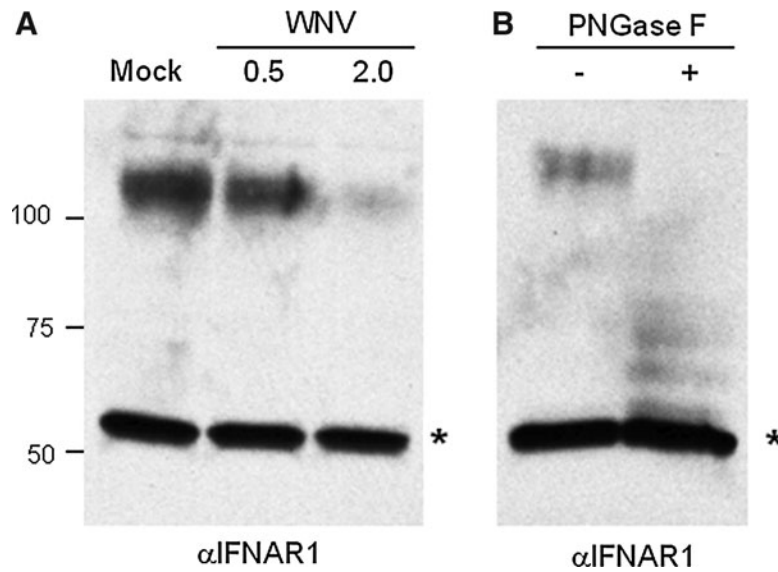

**SUPPLEMENTARY FIG. 1.** (A) HeLa cells were infected with WNV NY99 at an MOI of 0.5 or 2 for 24 h and lysates were analyzed by Western blotting with anti-IFNAR1 antibody. (B) HeLa cell lysates were immunoprecipitated with IFNAR1 antibodies. Immunoprecipitated samples were mock- or PNGase F-treated. Asterisks non-specific bands.

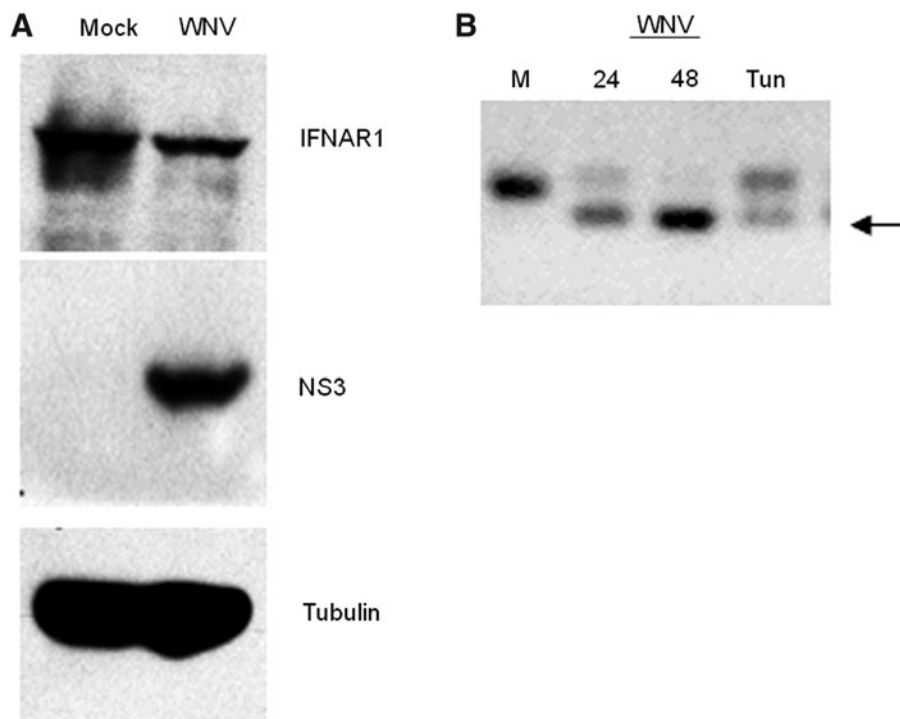

**SUPPLEMENTARY FIG. 2.** (A) A549 cells were infected with WNV at MOI of 2 for 24 h. Cell lysates were analyzed by Western blotting using antibodies against IFNAR1, NS3, and tubulin. (B) A549 cells were infected with WNV at an MOI of 2 for 24 and 48 h, or treated with tunicamycin (Tun) for 3 h. Total RNA was analyzed for: XBP1 splicing by reverse transcription PCR (arrow denotes spliced XBP1).
